# Supplementary material for: Process optimization by response surface methodology for transesterification of renewable ethyl acetate to butyl acetate biofuel additive over borated USY zeolite
Source: Royal Society of Chemistry journal article supplement (doi:10.1039/c4ra14771e), 2015-01-01
Supplement: c4ra14771e1.pdf [file c4ra14771e1.pdf]

**Supporting Information for Publication**

**Process Optimization by Response Surface Methodology for Transesterification of Renewable Ethyl Acetate to Butyl Acetate Biofuel Additive over Borated USY Zeolite**

**Kakasaheb Y. Nandiwale, Nitish D. Galande and Vijay V. Bokade\***

Catalysis and Inorganic Chemistry Division, CSIR - National Chemical Laboratory, Pune-411008, India.

\*Correspondence to:

Dr. Vijay V. Bokade

Catalysis and Inorganic Chemistry Division,

CSIR - National Chemical Laboratory,

Pune-411008, India.

Ph; +91-20-25902458, Fax; +91-20-25902634

E-mail: [yv.bokade@ncl.res.in](mailto:yv.bokade@ncl.res.in)

**Table S1.** The Box-Behnken design matrix of the three process variables in coded units and the experimental and predicted response values.

| Run | Process variables in coded units |                |                | Yield of <i>n</i> -Butyl Acetate, Y (%) |           |
|-----|----------------------------------|----------------|----------------|-----------------------------------------|-----------|
|     | X <sub>1</sub>                   | X <sub>2</sub> | X <sub>3</sub> | Experimental                            | Predicted |
| 1   | 0                                | 0              | 0              | 87                                      | 87        |
| 2   | 0                                | +              | +              | 97                                      | 96        |
| 3   | 0                                | 0              | 0              | 87                                      | 87        |
| 4   | -                                | +              | 0              | 54                                      | 55.5      |
| 5   | 0                                | -              | -              | 66                                      | 67        |
| 6   | 0                                | 0              | 0              | 87                                      | 87        |
| 7   | 0                                | -              | +              | 75                                      | 75        |
| 8   | -                                | -              | 0              | 52                                      | 52.5      |
| 9   | +                                | 0              | -              | 63                                      | 63.5      |
| 10  | 0                                | +              | -              | 55                                      | 55        |
| 11  | 0                                | 0              | 0              | 87                                      | 87        |
| 12  | -                                | 0              | +              | 56                                      | 55.5      |
| 13  | 0                                | 0              | 0              | 87                                      | 87        |
| 14  | -                                | 0              | -              | 42                                      | 40.5      |
| 15  | +                                | 0              | +              | 96                                      | 97.5      |
| 16  | +                                | -              | 0              | 85                                      | 83.5      |
| 17  | +                                | +              | 0              | 90                                      | 89.5      |

**Table S2.** ANOVA for response surface quadratic model.

| <b>Source</b>                 | <b>Sum of squares</b> | <b>Df</b> | <b>Mean square</b> | <b>F-value</b> | <b>p-value<br/>Prob &gt; F</b> |             |
|-------------------------------|-----------------------|-----------|--------------------|----------------|--------------------------------|-------------|
| Model                         | 4998.24               | 9         | 555.36             | 323.96         | < 0.0001                       | significant |
| X <sub>1</sub>                | 2112.5                | 1         | 2112.5             | 1232.29        | < 0.0001                       |             |
| X <sub>2</sub>                | 40.5                  | 1         | 40.5               | 23.63          | 0.0018                         |             |
| X <sub>3</sub>                | 1200.5                | 1         | 1200.5             | 700.29         | < 0.0001                       |             |
| X <sub>1</sub> X <sub>2</sub> | 2.25                  | 1         | 2.25               | 1.31           | 0.2896                         |             |
| X <sub>1</sub> X <sub>3</sub> | 90.25                 | 1         | 90.25              | 52.65          | 0.0002                         |             |
| X <sub>2</sub> X <sub>3</sub> | 272.25                | 1         | 272.25             | 158.81         | < 0.0001                       |             |
| X <sub>1</sub> <sup>2</sup>   | 697.96                | 1         | 697.96             | 407.14         | < 0.0001                       |             |
| X <sub>2</sub> <sup>2</sup>   | 63.22                 | 1         | 63.22              | 36.88          | 0.0005                         |             |
| X <sub>3</sub> <sup>2</sup>   | 410.59                | 1         | 410.59             | 239.51         | < 0.0001                       |             |
| Residual                      | 12.0                  | 7         | 1.71               |                |                                |             |
| Lack of Fit                   | 12.0                  | 3         | 4.0                |                |                                |             |
| Pure Error                    | 0                     | 4         | 0                  |                |                                |             |
| Cor Total                     | 5010.24               | 16        |                    |                |                                |             |

R<sup>2</sup> = 0.9976; R<sup>2</sup>-adjusted = 0.9945; R<sup>2</sup>-predicted = 0.9617; CV = 1.76%
